# Supplementary material for: Maternal weight trajectories and associations with infant growth in South African women
Source: PubMed Central journal article supplement (PMC10588171; doi:10.1186/s12889-023-16963-3), 2023-10-20
Supplement: 12889_2023_16963_MOESM1_ESM.pdf [file 12889_2023_16963_MOESM1_ESM.pdf]

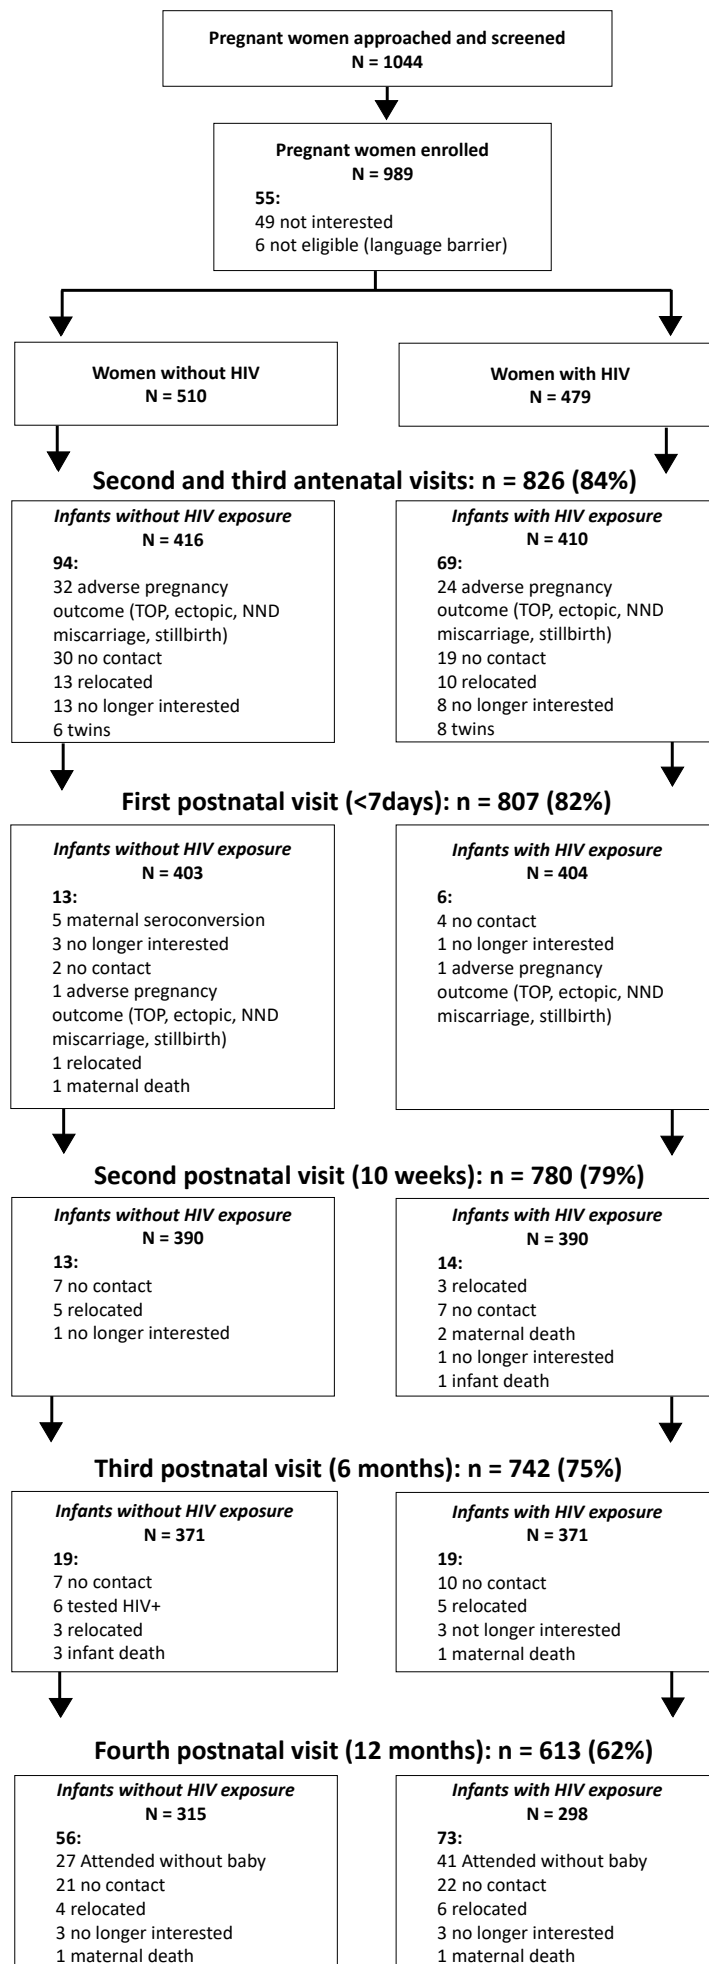

Figure S1. Flow diagram showing participant retention and selection of infants included for growth analysis
