# Supplementary material for: Maternal weight trajectories and associations with infant growth in South African women
Source: PubMed Central journal article supplement (PMC10588171; doi:10.1186/s12889-023-16963-3), 2023-10-20
Supplement: 12889_2023_16963_MOESM2_ESM.pdf [file 12889_2023_16963_MOESM2_ESM.pdf]

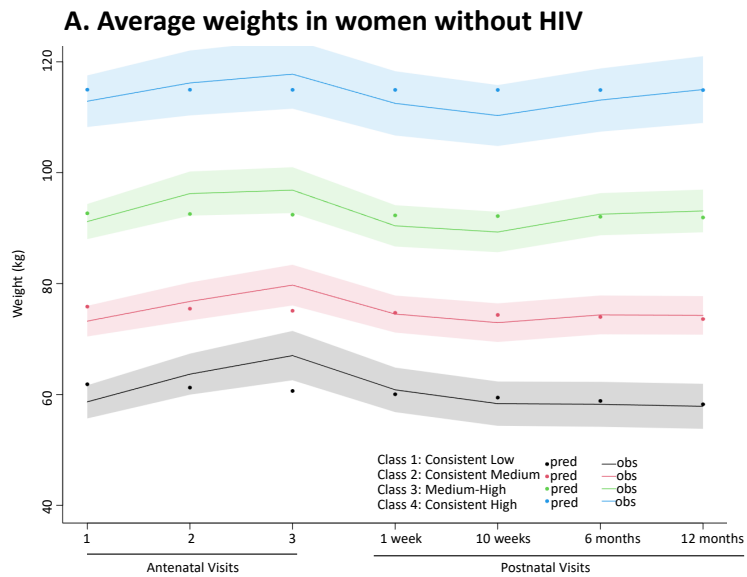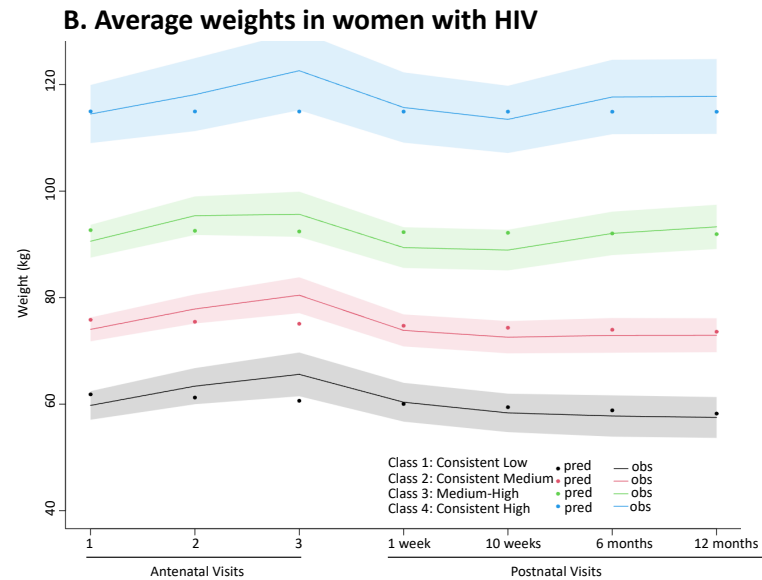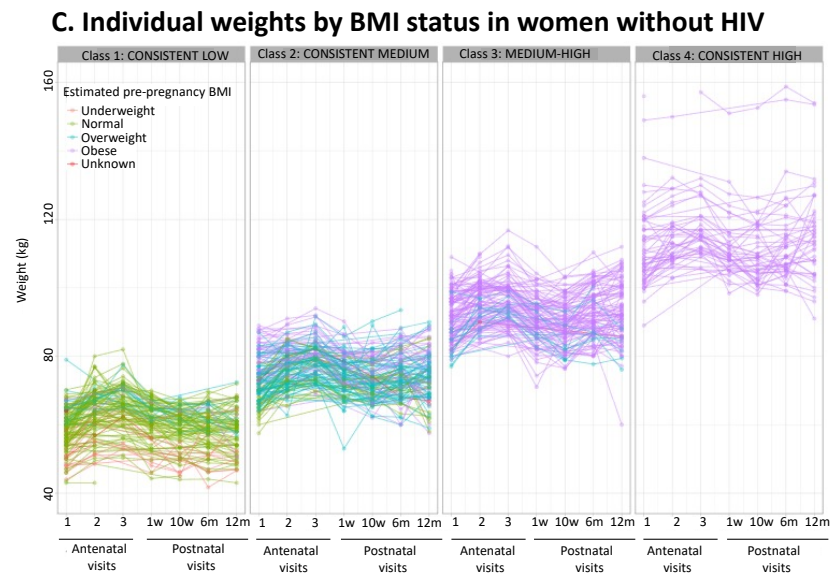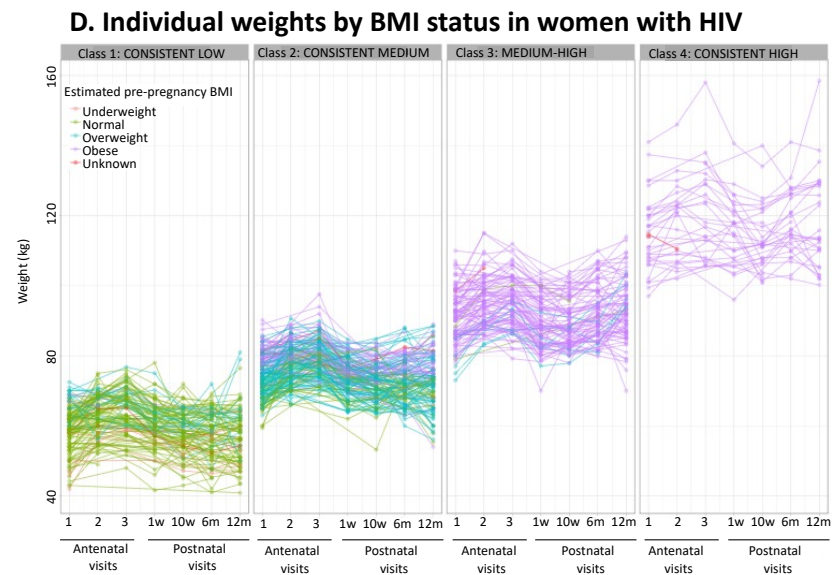

Figure S2. Four distinct maternal weight trajectory classes, A. average weights among women without HIV, B. average weights among women with HIV, C. individual weights by estimated pre-pregnancy BMI among women without HIV and D. individual weights by estimated pre-pregnancy BMI among women with HIV.
